# Supplementary material for: A feasible random copolymer approach for high-efficiency polymeric photovoltaic cells
Source: Royal Society of Chemistry journal article supplement (doi:10.1039/c6ta04920f), 2016-01-01
Supplement: c6ta04920f1.pdf [file c6ta04920f1.pdf]

## Electronic Supplementary Information

### **A feasible random copolymer approach for high-efficiency polymeric photovoltaic cells**

You-Sun Lee,<sup>‡a</sup> Ji Young Lee,<sup>‡b</sup> Su-Mi Bang,<sup>a</sup> Bogyu Lim,<sup>\*b</sup> Jaechol Lee,<sup>b</sup> and Seok-In Na<sup>\*a</sup>

*<sup>a</sup>Professional Graduate School of Flexible and Printable Electronics, Polymer Materials  
Fusion Research Center, Chonbuk National University, 664-14, Deokjin-dong, Deokjin-gu,  
Jeonju-si, Jeollabuk-do, 561-756, Republic of Korea*

*<sup>b</sup> Future Technology Research Center, Corporate R&D, LG Chem Research Park, 188,  
Moonji-ro, Yuseong-gu, Daejeon, 34122, Republic of Korea.*

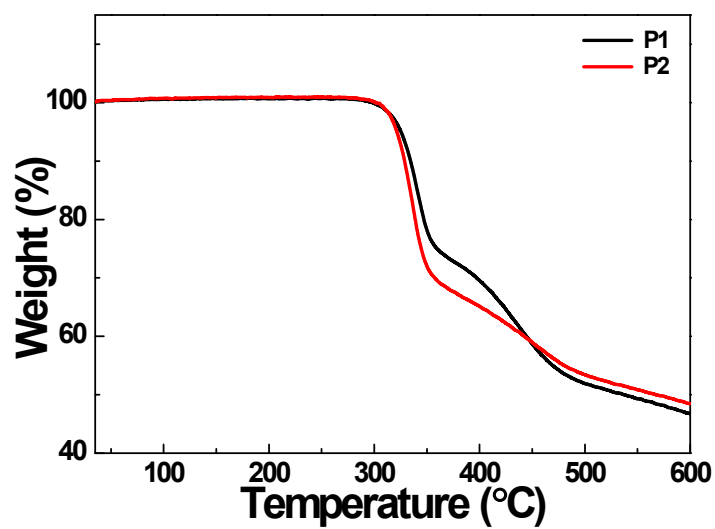

**Figure S1.** Thermal gravimetric analysis (TGA) curves of P1 and P2.

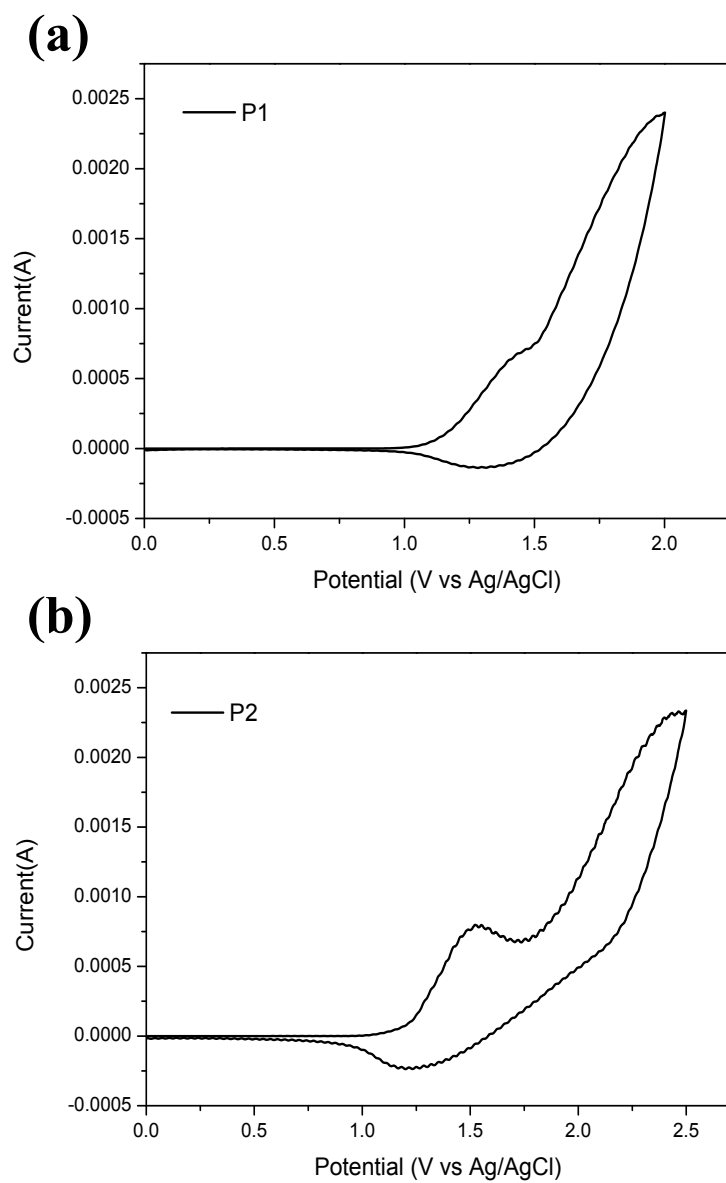

**Figure S2.** Cyclic voltammogram of (a) P1 and (b) P2

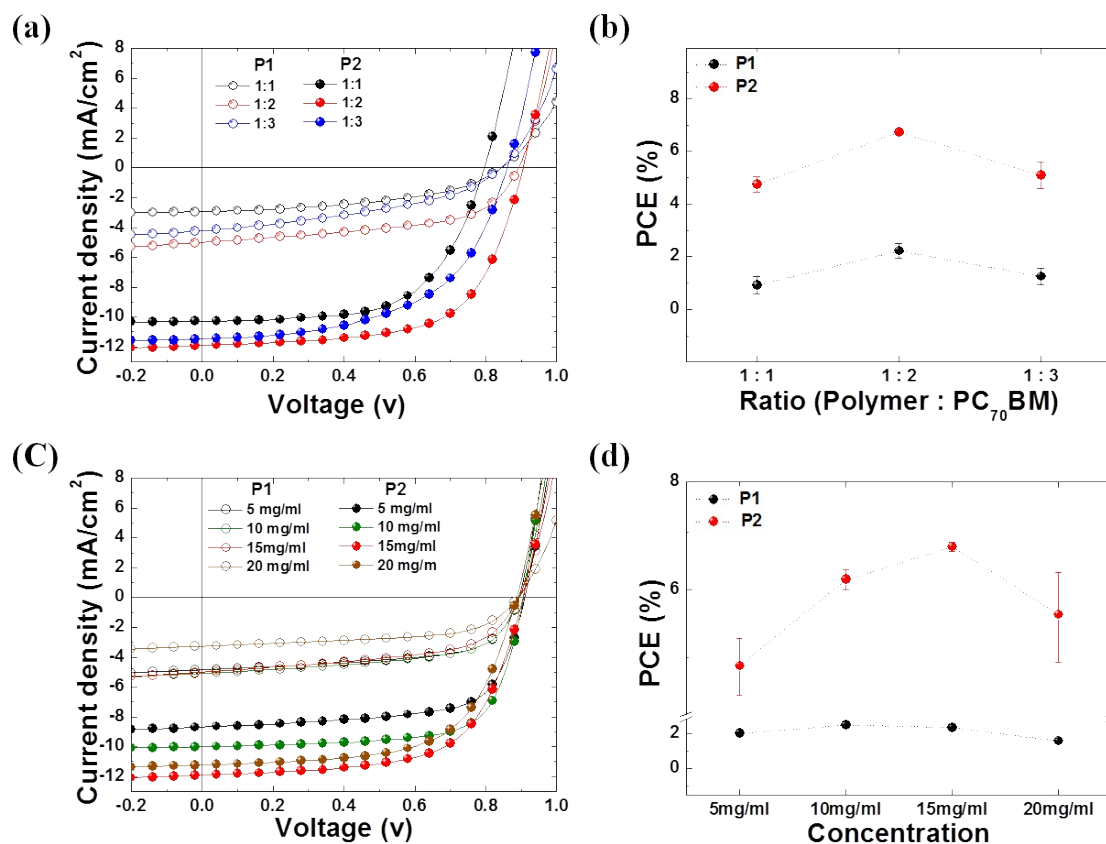

**Figure S3.** (a) The representative J–V curves for OPVs with various blend ratios (polymer:PC<sub>70</sub>BM). (b) PCE changes with different polymer:PC<sub>70</sub>BM ratios for P1 and P2 based devices. (c) The representative J–V curves for OPVs with various concentrations. (d) PCE changes with different concentrations for P1 and P2 based devices.
